# Supplementary material
Source: PubMed Central journal article supplement (PMC9970637)
Supplement: 8027_Appendix.pdf [file 8027_Appendix.pdf]

## APPENDIX

### A: Survey questions distributed to patients

**Question 1:** How many years have you been trying to conceive?

*Answers:*

<1, 1, 2, 3, 4, 5+

**Question 2:** How many children would you ideally like to have?

*Answers:*

1, 2, 3, 4+

**Question 3:** What treatments have you pursued for infertility so far?

*Answers [select multiple]:*

a. sperm retrieval (and any in-vitro fertilization (IVF) and/or intracytoplasmic sperm injection (ICSI) where sperm was injected into an egg); b. donor sperm; c. adoption; d. no further infertility treatment

**Question 4:** What is your highest level of education completed?

*Answers:*

Did not complete high school, high school, apprenticeship/trades diploma, college, CEGEP, or other non-university certificate/diploma, university undergrad, post grad degree, professional degree

**Question 5:** What is your approximate household income last year?

*Answers:*

<50,000/yr; 51-75,000/yr; 76-100,000/yr; 101-150,000/yr; 151-200,000/yr; 201-300,000/yr; >300,000/yr

**Question 6:** When treating fertility, no treatment option provides a 100% guarantee of success and patient and their physicians are often left choosing options with uncertain or minimal changes to a patient's chance at successful sperm retrieval (finding or identifying sperm).

Currently when performing surgical sperm retrieval (often termed an mTESE) the average chance of identifying sperm is 50%.

What is the minimal improvement in sperm retrieval rate that you would find acceptable to tolerate an additional medication?

***Wong J, et al. Patient and practitioner expectations for treatment of non-obstructive azoospermia***

***Answers:***

5% improvement – increasing your chance of success from the baseline of 50% to a new chance of success of 55%, 10% – increasing your chance of success from the baseline of 50% to a new chance of success of 60%, 25% – increasing your chance of success from the baseline of 50% to a new chance of success of 75%, 50% – increasing your chance of success from the baseline of 50% to a new chance of success of 99%

**Question 7:** What is the minimal improvement in sperm retrieval rate that you would find acceptable to tolerate an additional procedure/surgery?

***Answers:***

5% improvement – increasing your chance of success from the baseline of 50% to a new chance of success of 55%, 10% – increasing your chance of success from the baseline of 50% to a new chance of success of 60%, 25% – increasing your chance of success from the baseline of 50% to a new chance of success of 75%, 50% – increasing your chance of success from the baseline of 50% to a new chance of success of 99%

**Question 8:** Currently, with combined surgical sperm retrieval (mTESE) and injection into an egg (in vitro fertilization (IVF) and/or intracytoplasmic sperm injection (ICSI), the chance of achieving pregnancy without guarantee of a live birth is approximately 25%.

What is the minimal improvement in pregnancy rate that you would find acceptable to tolerate an additional medication?

***Answers:***

5% improvement – increasing your chance of success from the baseline of 25% to a new chance of success of 30%, 10% – increasing your chance of success from the baseline of 25% to a new chance of success of 35%, 25% – increasing your chance of success from the baseline of 25% to a new chance of success of 50%, 50% – increasing your chance of success from the baseline of 25% to a new chance of success of 75%

**Question 9:** What is the minimal improvement in pregnancy rate that you would find acceptable to tolerate an additional procedure/surgery?

***Answers:***

5% improvement – increasing your chance of success from the baseline of 25% to a new chance of success of 30%, 10% – increasing your chance of success from the baseline of 25% to a new chance of success of 35%, 25% – increasing your chance of success from the baseline of 25% to a new chance of success of 50%, 50% – increasing your chance of success from the baseline of 25% to a new chance of success of 75%

**Wong J, et al. Patient and practitioner expectations for treatment of non-obstructive azoospermia**

**Question 10:** Currently, with combined surgical sperm retrieval (mTESE) and injection into an egg (in vitro fertilization (IVF) and/or intracytoplasmic sperm injection (ICSI), the chance of achieving pregnancy culminating in childbirth (live birth rate) is approximately 25%.

What is the minimal improvement in live birth rate that you would find acceptable to tolerate an additional medication?

**Answers:**

5% improvement – increasing your chance of success from the baseline of 25% to a new chance of success of 30%, 10% – increasing your chance of success from the baseline of 25% to a new chance of success of 35%, 25% – increasing your chance of success from the baseline of 25% to a new chance of success of 50%, 50% – increasing your chance of success from the baseline of 25% to a new chance of success of 75%

**Question 11:** What is the minimal improvement in live birth rate that you would find acceptable to tolerate an additional procedure/surgery?

**Answers:**

5% improvement – increasing your chance of success from the baseline of 25% to a new chance of success of 30%, 10% – increasing your chance of success from the baseline of 25% to a new chance of success of 35%, 25% – increasing your chance of success from the baseline of 25% to a new chance of success of 50%, 50% – increasing your chance of success from the baseline of 25% to a new chance of success of 75%

**Question 12:** Currently, average cost for fertility treatment in the form of sperm retrieval (mTESE) and insemination (IVF or ICSI) ranges from approximately \$15,000 - \$50,000. In addition to these current costs, how much maximum additional cost would you be willing to spend to achieve a:

5% improvement in live birth rate – increasing your chance of success from baseline of 25% to a new chance of success of 30%.

Answers: \$0, \$5 000, \$10 000, \$15 000, \$20 000, \$25 000, \$30 000, \$35 000, \$40 000

10% improvement in live birth rate – increasing your chance of success from baseline of 25% to a new chance of success of 35%.

Answers: \$0, \$5 000, \$10 000, \$15 000, \$20 000, \$25 000, \$30 000, \$35 000, \$40 000

25% improvement in live birth rate – increasing your chance of success from baseline of 25% to a new chance of success of 50%.

Answers: \$0, \$5 000, \$10 000, \$15 000, \$20 000, \$25 000, \$30 000, \$35 000, \$40 000

50% improvement in live birth rate – increasing your chance of success from baseline of 25% to a new chance of success of 75%.

**Answers:**

\$0, \$5 000, \$10 000, \$15 000, \$20 000, \$25 000, \$30 000, \$35 000, \$40 000

*Wong J, et al. Patient and practitioner expectations for treatment of non-obstructive azoospermia*

**B: Survey questions distributed to urologists**

**Question 1:** How many years have you been in practice?

*Answers:*

<5 years, 5-10 years, 10-15 years, >15 years

**Question 2:** Did you complete a fellowship that included treatment of male infertility?

*Answers:*

Yes, No

**Question 3:** How would you characterize your practice?

*Answers:*

Academic, community, both

**Question 4:** How many patients with non-obstructive azoospermia do you treat a year (approximately)?

*Answers:*

<10, 10-50, >50

**Question 5:** What is the minimal percent improvement in sperm retrieval rate for non-obstructive azoospermia, do you think patients would find acceptable to tolerate an additional medication? (The current average sperm retrieval rate is approximately 50%)

*Answers:*

5% improvement – increasing the chance of success from the baseline of 50% to a new chance of success of 55%, 10% – increasing the chance of success from the baseline of 50% to a new chance of success of 60%, 25% – increasing the chance of success from the baseline of 50% to a new chance of success of 75%, 50% – increasing the chance of success from the baseline of 50% to a new chance of success of 99%

**Question 6:** What is the minimal percent improvement in sperm retrieval rate for non-obstructive azoospermia, do you think patients would find acceptable to tolerate an additional procedure/surgery? (The current average sperm retrieval rate is approximately 50%)

*Answers:*

5% improvement – increasing the chance of success from the baseline of 50% to a new chance of success of 55%, 10% – increasing the chance of success from the baseline of 50% to a new chance of success of 60%, 25% – increasing the chance of success from the baseline of 50% to a new chance of success of 75%, 50% – increasing the chance of success from the baseline of 50% to a new chance of success of 99%

***Wong J, et al. Patient and practitioner expectations for treatment of non-obstructive azoospermia***

**Question 7:** What is the minimal percent improvement in clinical pregnancy rate for non-obstructive azoospermia, do you think patients would find acceptable to tolerate an additional medication? (The current pregnancy rates are approximately 25%)

***Answers:***

5% improvement – increasing the chance of success from the baseline of 30% to a new chance of success of 35%, 10% – increasing the chance of success from the baseline of 30% to a new chance of success of 40%, 25% – increasing the chance of success from the baseline of 30% to a new chance of success of 55%, 50% – increasing the chance of success from the baseline of 30% to a new chance of success of 80%

**Question 8:** What is the minimal percent improvement in clinical pregnancy rate for non-obstructive azoospermia, do you think patients would find acceptable to tolerate an additional procedure/surgery? (The current pregnancy rates are approximately 25%)

***Answers:***

5% improvement – increasing the chance of success from the baseline of 25% to a new chance of success of 30%, 10% – increasing the chance of success from the baseline of 25% to a new chance of success of 35%, 25% – increasing the chance of success from the baseline of 25% to a new chance of success of 50%, 50% – increasing the chance of success from the baseline of 25% to a new chance of success of 75%

**Question 9:** What is the minimal percent improvement in live birth rate for non-obstructive azoospermia, do you think patients would find acceptable to tolerate an additional medication? (The current live birth rate for couples who have to undergo microTESE sperm retrieval + IVF ICSI (in vitro fertilization and intracytoplasmic sperm injection) is 25%)

***Answers:***

5% improvement – increasing the chance of success from the baseline of 25% to a new chance of success of 30%, 10% – increasing the chance of success from the baseline of 25% to a new chance of success of 35%, 25% – increasing the chance of success from the baseline of 25% to a new chance of success of 50%, 50% – increasing the chance of success from the baseline of 25% to a new chance of success of 75%

**Question 10:** What is the minimal percent improvement in live birth rate for non-obstructive azoospermia, do you think patients would find acceptable to tolerate an additional procedure/surgery? (The current live birth rate for couples who have to undergo microTESE sperm retrieval + IVF ICSI (in vitro fertilization and intracytoplasmic sperm injection) is 25%)

***Answers:***

5% improvement – increasing the chance of success from the baseline of 25% to a new chance of success of 30%, 10% – increasing the chance of success from the baseline of 25% to a new

**Wong J, et al. Patient and practitioner expectations for treatment of non-obstructive azoospermia**

chance of success of 35%, 25% – increasing the chance of success from the baseline of 25% to a new chance of success of 50%, 50% – increasing the chance of success from the baseline of 25% to a new chance of success of 75%

**Question 11:** Currently, average cost for fertility treatment in the form of sperm retrieval (mTESE) and insemination (IVF or ICSI) ranges from approximately \$15,000 - \$50,000. In addition to these current costs, what maximum additional financial cost do you think patients would be willing to accrue to achieve an improvement in live birth rate:

5% improvement in live birth rate – increasing the chance of success from baseline of 25% to a new chance of success of 30%

**Answers:**

\$0, \$5 000, \$10 000, \$15 000, \$20 000, \$25 000, \$30 000, \$35 000, \$40 000

10% improvement in live birth rate – increasing the chance of success from baseline of 25% to a new chance of success of 35%.

**Answers:**

\$0, \$5 000, \$10 000, \$15 000, \$20 000, \$25 000, \$30 000, \$35 000, \$40 000

25% improvement in live birth rate – increasing the chance of success from baseline of 25% to a new chance of success of 50%.

**Answers:**

\$0, \$5 000, \$10 000, \$15 000, \$20 000, \$25 000, \$30 000, \$35 000, \$40 000

50% improvement in live birth rate – increasing the chance of success from baseline of 25% to a new chance of success of 75%.

**Answers:**

\$0, \$5 000, \$10 000, \$15 000, \$20 000, \$25 000, \$30 000, \$35 000, \$40 000
